# Supplementary material for: The “Real R0”: A Resection Margin Smaller Than 0.1 cm is Associated with a Poor Prognosis After Oncologic Esophagectomy
Source: PubMed Central journal article supplement (PMC8519834; doi:10.1245/s10434-021-10121-y), 2021-05-26
Supplement: 10434_2021_10121_MOESM1_ESM.pdf [file 10434_2021_10121_MOESM1_ESM.pdf]

**Online appendix 1** Surgical technique and post-operative course for all the study population, according to their R status.

|                             | <b>All patients</b><br><b>N=160</b> | <b>R0</b><br><b>&gt;0.1cm</b><br><b>N=113</b> | <b>R0+</b><br><b>≤0.1cm</b><br><b>N=34</b> | <b>R1</b><br><b>0cm</b><br><b>N=13</b> | <i>P-value</i> |
|-----------------------------|-------------------------------------|-----------------------------------------------|--------------------------------------------|----------------------------------------|----------------|
| Type of resection           |                                     |                                               |                                            |                                        | 0.157          |
| Lewis Santy                 | 133 (83.1)                          | 94 (83.2)                                     | 9 (69.2)                                   | 29 (85.3)                              |                |
| Mckeown                     | 19 (11.9)                           | 15 (13.3)                                     | 2 (15.4)                                   | 2 (5.9)                                |                |
| Transhiatal                 | 9 (5.6)                             | 4 (3.5)                                       | 2 (15.4)                                   | 3 (8.8)                                |                |
| Minimally invasive approach |                                     |                                               |                                            |                                        |                |
| Laparoscopy                 | 130 (81.3)                          | 91 (80.5)                                     | 10 (76.9)                                  | 29 (85.3)                              | 0.858          |
| Thoracoscopy                | 80 (50.0)                           | 58 (51.3)                                     | 5 (38.5)                                   | 17 (50.0)                              | 0.680          |
| Severe complication         | 56 (35.0)                           | 39 (34.5)                                     | 4 (30.8)                                   | 13 (38.2)                              | 0.874          |
| Anastomotic leakage         | 58 (36.3)                           | 41 (36.3)                                     | 4 (30.8)                                   | 13 (38.2)                              | 0.893          |

Categorical variables are expressed as N (%).

**Online appendix 2** Subgroup analysis for squamous cell carcinoma patients (SCC)

|                      | <b>All patients</b><br>N=62 | <b>R0 &gt;0.1cm</b><br>N=46 | <b>R0+ ≤0.1cm</b><br>N=10 | <b>R1 0cm</b><br>N=6 | <i>P-value</i> |
|----------------------|-----------------------------|-----------------------------|---------------------------|----------------------|----------------|
| Male gender          | 45 (72.6)                   | 31 (67.4)                   | 10 (100)                  | 4 (66.7)             | 0.105          |
| Age, years           | 64.1 [8.7]                  | 63 [8]                      | 70 [8.6]                  | 62.7 [11.7]          | 0.066          |
| ASA class            |                             |                             |                           |                      | 0.436          |
| 1-2                  | 36 (58.1)                   | 28 (60.9)                   | 7 (70)                    | 1 (16.7)             |                |
| 3-4                  | 26 (41.9)                   | 18 (39.1)                   | 3 (30)                    | 5 (83.3)             |                |
| SUVmax (g/l)         | 13.9[9.6]                   | 13.3 [8.9]                  | 14.7 [10.8]               | 17.3 [13.5]          | 0.679          |
| cT stage             |                             |                             |                           |                      | 0.324          |
| 1                    | 7 (11.3)                    | 7 (15.2)                    | 0 (0)                     | 0 (0)                |                |
| 2                    | 11 (17.7)                   | 9 (19.6)                    | 2 (20)                    | 0 (0)                |                |
| 3                    | 44 (71)                     | 30 (65.2)                   | 8 (80)                    | 6 (100)              |                |
| cN stage             |                             |                             |                           |                      | 0.770          |
| 0                    | 27 (43.5)                   | 21 (45.7)                   | 3 (30)                    | 3 (50)               |                |
| 1                    | 28 (45.2)                   | 19 (41.3)                   | 6 (60)                    | 3 (50)               |                |
| 2                    | 6 (9.7)                     | 5 (10.9)                    | 1 (10)                    | 0 (0)                |                |
| NAT                  | 50 (80.6)                   | 36 (78.3)                   | 8 (80)                    | 6 (100)              | 0.447          |
| NAT type             |                             |                             |                           |                      | 0.541          |
| Chemotherapy         | 2 (3.2)                     | 1 (2.2)                     | 0 (0)                     | 1 (16.7)             |                |
| Chemoradiation       | 47 (75.8)                   | 34 (73.9)                   | 8 (80)                    | 5 (83.3)             |                |
| Surgical approach    |                             |                             |                           |                      | 0.867          |
| Lewis                | 41 (66.1)                   | 31 (67.4)                   | 7 (70)                    | 3 (50)               |                |
| McKeown              | 16 (25.8)                   | 12 (26.1)                   | 2 (20)                    | 2 (33.3)             |                |
| Transhiatal          | 5 (8.1)                     | 3 (6.5)                     | 1 (10)                    | 1 (16.7)             |                |
| Severe complications | 23 (37.1)                   | 17 (37)                     | 2 (20)                    | 4 (66.7)             | 0.964          |
| Anastomotic leakage  | 27 (43.5)                   | 19 (41.3)                   | 5 (50)                    | 3 (50)               | 0.833          |
| pT stage             |                             |                             |                           |                      | <0.001         |
| 0                    | 22 (35.5)                   | 22 (47.9)                   | 0 (0)                     | 0 (0)                |                |
| 1                    | 16 (25.8)                   | 15 (32.6)                   | 1 (10)                    | 0 (0)                |                |

|  |                         |           |           |        |          |       |
|--|-------------------------|-----------|-----------|--------|----------|-------|
|  | 2                       | 3 (4.8)   | 3 (6.5)   | 0 (0)  | 0 (0)    |       |
|  | 3                       | 21 (33.9) | 6 (13)    | 9 (90) | 6 (100)  |       |
|  | pN stage                |           |           |        |          | 0.003 |
|  | 0                       | 48 (77.4) | 37 (80.4) | 7 (70) | 4 (66.7) |       |
|  | 1                       | 10 (16.1) | 8 (17.4)  | 1 (10) | 1 (16.7) |       |
|  | 2                       | 1 (1.6)   | 0 (0)     | 0 (0)  | 1 (16.7) |       |
|  | 3                       | 2 (3.2)   | 0 (0)     | 2 (20) | 0 (0)    |       |
|  | TRG                     |           |           |        |          | 0.001 |
|  | 1-2                     | 27 (43.5) | 24 (52.2) | 2 (20) | 1 (16.7) |       |
|  | 3-5                     | 17 (27.4) | 6 (13)    | 6 (60) | 5 (83.3) |       |
|  | Early recurrence        | 16 (25.8) | 7 (15.2)  | 4 (40) | 5 (83.3) | 0.001 |
|  | Locoregional recurrence | 16 (25.8) | 10 (21.7) | 2 (20) | 4 (66.7) | 0.059 |
|  | Distant recurrence      | 14 (22.6) | 8 (17.4)  | 3 (30) | 3 (50)   | 0.179 |

Categorical variables are expressed as N (%), and continuous variables as median [IQR].

### Online appendix 3 Survival analysis for squamous cell carcinoma (SCC)

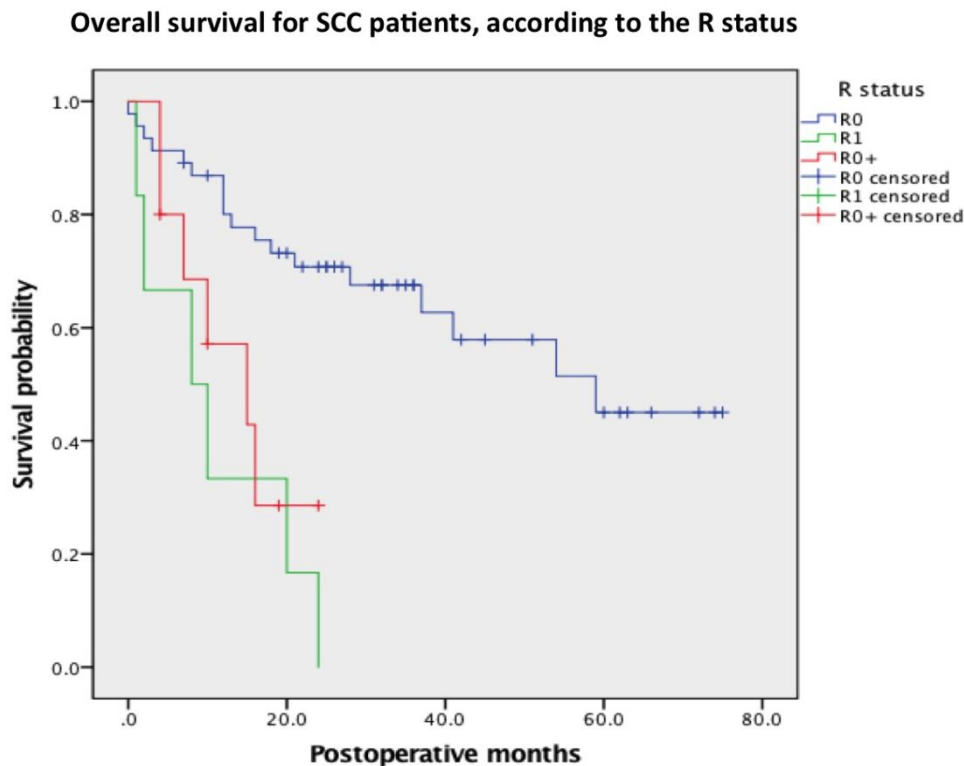

| Nb at risk | 0 mo | 20 mo | 40 mo | 60 mo | 80 mo |
|------------|------|-------|-------|-------|-------|
| R0         | 45   | 30    | 13    | 6     | 0     |
| R0+        | 9    | 1     | 0     | 0     | 0     |
| R1         | 5    | 1     | 0     | 0     | 0     |

Figure legend: R0 patients had a mean OS of 48.6 months (95%CI 39.4-57.7), significantly better than R0+ (median 15 months 95%CI 3.0-26.9,  $p=0.012$ ) and R1 patients (median 8 months, 95%CI 0-17.6,  $p<0.001$ ). The difference was not significant between R0+ and R1 patients ( $p=0.391$ ).

R0: resection margins  $>1\text{mm}$  R0+: resection margins  $\leq 1\text{mm}$  R1: resection margins 0mm

Disease-free survival for SCC patients, according to the R status

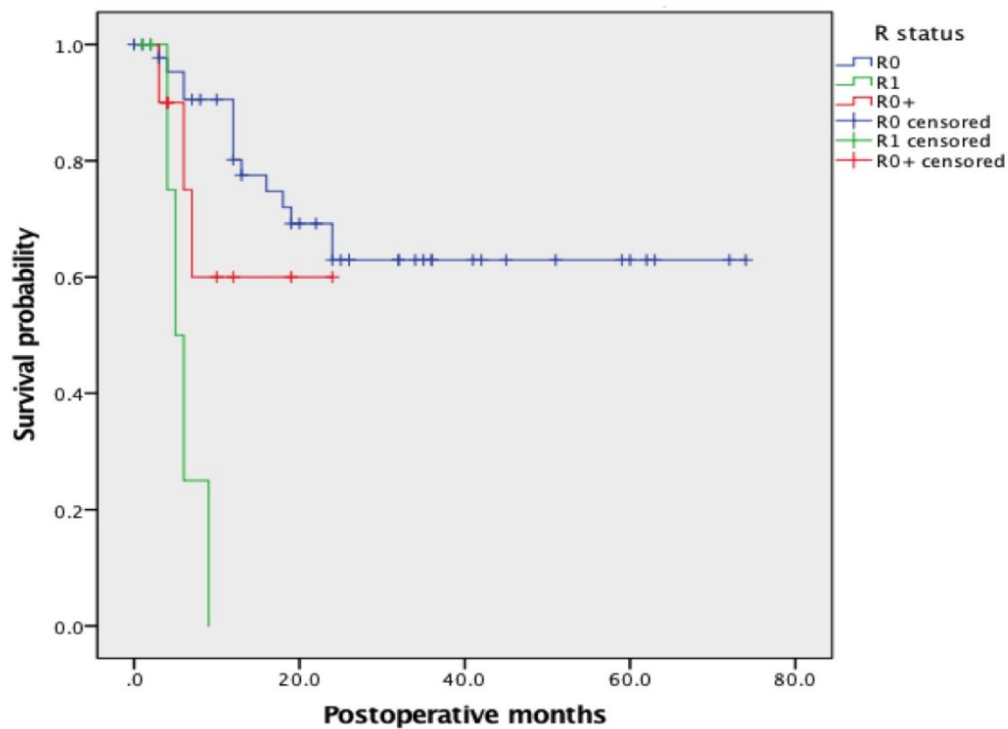

| Nb at risk | 0 mo | 20 mo | 40 mo | 60 mo | 80 mo |
|------------|------|-------|-------|-------|-------|
| R0         | 45   | 23    | 9     | 4     | 0     |
| R0+        | 9    | 1     | 0     | 0     | 0     |
| R1         | 5    | 0     | 0     | 0     | 0     |

Figure legend: R0 patients had a mean DFS of 51.6 months (95%CI 42.1-61.0), not significantly different from R0+ (mean 16.6 months 95%CI 10.1-23.2,  $p=0.298$ ) and significantly better than R1 patients (median 5 months, 95%CI 3.0-6.9,  $p<0.001$ ). R0+ patients had a significantly better DFS than R1 ( $p=0.049$ ).

R0: resection margins  $>1\text{mm}$  R0+: resection margins  $\leq 1\text{mm}$  R1: resection margins  $0\text{mm}$

**Online appendix 4** Subgroup analysis for **adenocarcinoma patients (AC)**

|                      | <b>All<br/>patients<br/>N=98</b> | <b>R0<br/>&gt;0.1cm<br/>N=67</b> | <b>R0+<br/>≤0.1cm<br/>N=24</b> | <b>R1<br/>0cm<br/>N=7</b> | <i>P-value</i> |
|----------------------|----------------------------------|----------------------------------|--------------------------------|---------------------------|----------------|
| Male gender          | 82 (83.7)                        | 55 (82.1)                        | 20 (83.3)                      | 7 (100)                   | 0.475          |
| Age, years           | 61.5[10.2]                       | 60.4 [9.4]                       | 65.3 [11.7]                    | 59 [10.0]                 | 0.101          |
| ASA class            |                                  |                                  |                                |                           | 0.281          |
| 1-2                  | 62 (63.3)                        | 43 (64.2)                        | 17 (70.8)                      | 2 (28.6)                  |                |
| 3-4                  | 36 (36.7)                        | 24 (35.8)                        | 7 (29.2)                       | 5 (71.4)                  |                |
| SUVmax (g/l)         | 13.8[8.8]                        | 14.5 [10]                        | 12.3 [5.8]                     | 13.4 [4.7]                | 0.581          |
| cT stage             |                                  |                                  |                                |                           | 0.276          |
| 1                    | 9 (9.2)                          | 9 (13.4)                         | 0 (0)                          | 0 (0)                     |                |
| 2                    | 11 (11.2)                        | 8 (12)                           | 2 (8.3)                        | 1 (14.3)                  |                |
| 3                    | 78 (79.6)                        | 50 (74.6)                        | 22 (91.7)                      | 6 (85.7)                  |                |
| cN stage             |                                  |                                  |                                |                           | 0.637          |
| 0                    | 32 (32.7)                        | 22 (32.8)                        | 9 (37.5)                       | 1 (14.3)                  |                |
| 1                    | 54 (55.1)                        | 37 (55.2)                        | 11 (45.8)                      | 6 (85.7)                  |                |
| 2-3                  | 10 (10.2)                        | 6 (9)                            | 4 (16.7)                       | 0 (0)                     |                |
| NAT                  | 84 (85.7)                        | 55 (82.1)                        | 22 (91.7)                      | 7 (100)                   | 0.134          |
| NAT type             |                                  |                                  |                                |                           | 0.138          |
| Chemotherapy         | 22 (22.4)                        | 12 (17.9)                        | 6 (25)                         | 4 (57.1)                  |                |
| Chemoradiation       | 59 (60.2)                        | 40 (59.7)                        | 16 (66.7)                      | 3 (42.9)                  |                |
| Surgical approach    |                                  |                                  |                                |                           | 0.250          |
| Lewis                | 91 (92.8)                        | 63 (94)                          | 22 (91.7)                      | 6 (85.7)                  |                |
| McKeown              | 3 (3.1)                          | 3 (4.5)                          | 0 (0)                          | 0 (0)                     |                |
| Transhiatal          | 4 (4.1)                          | 1 (1.5)                          | 2 (8.3)                        | 1 (14.3)                  |                |
| Severe complications | 33 (33.7)                        | 22 (32.8)                        | 9 (37.5)                       | 2 (28.6)                  | 0.878          |
| Anastomotic leakage  | 31 (31.6)                        | 22 (32.8)                        | 8 (33.3)                       | 1 (14.3)                  | 0.591          |
| pT stage             |                                  |                                  |                                |                           | <0.001         |
| 0                    | 11 (11.2)                        | 11 (16.5)                        | 0 (0)                          | 0 (0)                     |                |

|    |                         |           |           |           |          |       |
|----|-------------------------|-----------|-----------|-----------|----------|-------|
| 1  | 1                       | 24 (24.5) | 23 (34.3) | 1 (4.2)   | 0 (0)    |       |
| 2  | 2                       | 9 (9.2)   | 9 (13.4)  | 0 (0)     | 0 (0)    |       |
| 3  | 3                       | 54 (55.1) | 24 (35.8) | 23 (95.8) | 7 (100)  |       |
| 4  |                         |           |           |           |          |       |
| 5  |                         |           |           |           |          |       |
| 6  |                         |           |           |           |          |       |
| 7  |                         |           |           |           |          |       |
| 8  | pN stage                |           |           |           |          | 0.001 |
| 9  | 0                       | 59 (60.2) | 50 (74.6) | 8 (33.3)  | 1 (14.3) |       |
| 10 | 1                       | 20 (20.4) | 9 (13.4)  | 8 (33.3)  | 3 (42.9) |       |
| 11 | 2                       | 11 (11.2) | 6 (9)     | 4 (16.7)  | 1 (14.3) |       |
| 12 | 3                       | 8 (8.2)   | 2 (3)     | 4 (16.7)  | 2 (28.6) |       |
| 13 |                         |           |           |           |          |       |
| 14 |                         |           |           |           |          |       |
| 15 |                         |           |           |           |          |       |
| 16 | TRG                     |           |           |           |          | 0.001 |
| 17 | 1-2                     | 49 (50)   | 23 (34.3) | 20 (83.3) | 6 (85.6) |       |
| 18 | 3-5                     | 33 (33.7) | 29 (43.2) | 3 (12.5)  | 1 (14.3) |       |
| 19 |                         |           |           |           |          |       |
| 20 |                         |           |           |           |          |       |
| 21 | Early recurrence        | 28 (28.6) | 14 (20.9) | 11 (45.8) | 3 (42.9) | 0.046 |
| 22 |                         |           |           |           |          |       |
| 23 |                         |           |           |           |          |       |
| 24 | Locoregional recurrence | 16 (16.3) | 8 (11.9)  | 5 (20.8)  | 3 (42.9) | 0.043 |
| 25 |                         |           |           |           |          |       |
| 26 |                         |           |           |           |          |       |
| 27 |                         |           |           |           |          |       |
| 28 | Distant recurrence      | 36 (36.7) | 19 (28.4) | 12 (50)   | 5 (71.4) | 0.010 |
| 29 |                         |           |           |           |          |       |

Categorical variables are expressed as N (%), and continuous variables as median [IQR].

1  
2  
3 **Online appendix 5** Subgroup survival analysis for **adenocarcinoma (AC)**  
4  
5  
6  
7

8 **Overall survival for AC patients, according to the R status**  
9

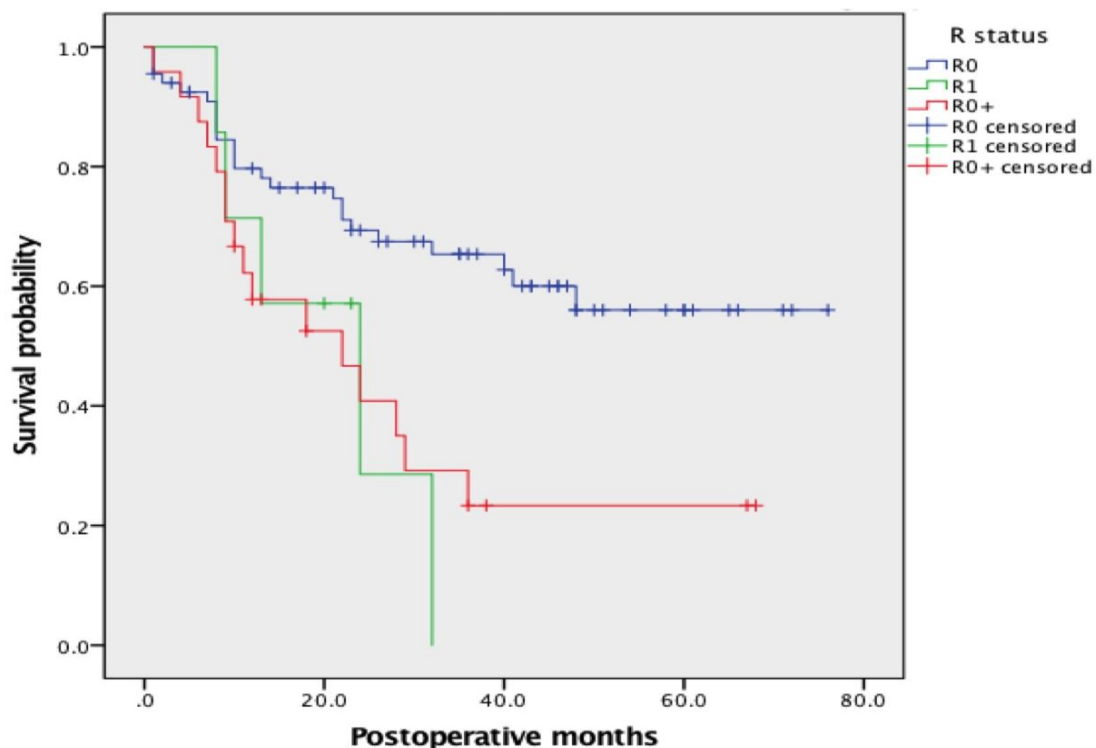

| Nb at risk | 0 mo | 20 mo | 40 mo | 60 mo | 80 mo |
|------------|------|-------|-------|-------|-------|
| R0         | 66   | 43    | 27    | 7     | 0     |
| R0+        | 23   | 4     | 0     | 0     | 0     |
| R1         | 6    | 3     | 0     | 0     | 0     |

35  
36  
37  
38  
39  
40  
41  
42

43 Figure legend: R0 patients had a mean OS of 51.1 months (95%CI 43.2-58.9), significantly  
44 better than R0+ (median 22 months 95%CI 7.2-40.8,  $p=0.004$ ) and R1 patients (median 24  
45 months, 95%CI 2.7-23.3,  $p=0.041$ ). The difference was not significant between R0+ and R1  
46 patients ( $p=0.818$ ).  
47

48 R0: resection margins  $>1\text{mm}$  R0+: resection margins  $\leq 1\text{mm}$  R1: resection margins  $0\text{mm}$   
49  
50  
51  
52  
53  
54  
55  
56  
57  
58  
59  
60



Disease-free survival for AC patients, according to the R status

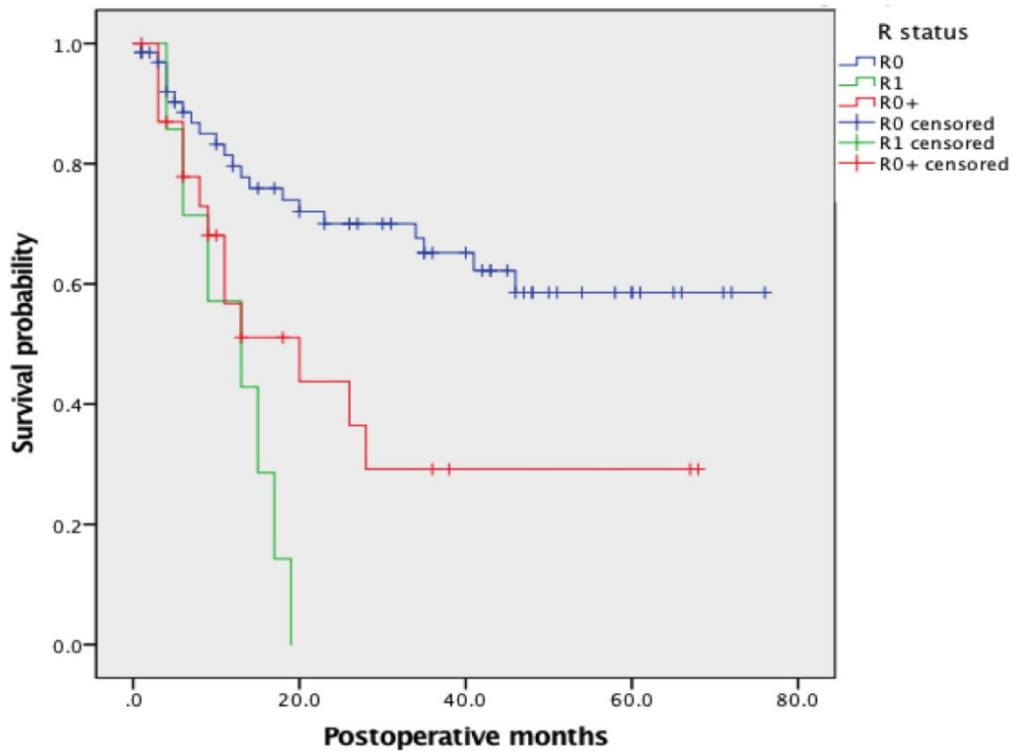

| Nb at risk | 0 mo | 20 mo | 40 mo | 60 mo | 80 mo |
|------------|------|-------|-------|-------|-------|
| R0         | 65   | 37    | 22    | 6     | 0     |
| R0+        | 23   | 6     | 0     | 0     | 0     |
| R1         | 6    | 0     | 0     | 0     | 0     |

Figure legend: R0 patients had a mean DFS of 52.1 months (95%CI 43.9-60.2), significantly better than R0+ (median 20 months 95%CI 3.9-36.1,  $p=0.010$ ) and R1 patients (median 13 months, 95%CI 2.7-23.3,  $p<0.001$ ). The difference was not significant between R0+ and R1 patients ( $p=0.088$ ).

R0: resection margins  $>1\text{mm}$  R0+: resection margins  $\leq 1\text{mm}$  R1: resection margins  $0\text{mm}$

**Online appendix 6** Subgroup descriptive analysis for patients who received NAT (SCC and AC)

|                      | <b>All patients<br/>N=131</b> | <b>R0<br/>&gt;0.1cm<br/>N=88</b> | <b>R0+<br/>≤0.1cm<br/>N=30</b> | <b>R1<br/>0cm<br/>N=13</b> | <i>P-value</i> |
|----------------------|-------------------------------|----------------------------------|--------------------------------|----------------------------|----------------|
| Male gender          | 103 (78.6)                    | 66 (75)                          | 26 (86.7)                      | 11 (84.6)                  | 0.346          |
| Age, years           | 62.7[9.7]                     | 61.8 [8.8]                       | 66.2 [11.4]                    | 60.7 [10.5]                | 0.075          |
| ASA class            |                               |                                  |                                |                            | 0.041          |
| 1-2                  | 81 (61.8)                     | 57 (46.8)                        | 21 (70)                        | 3 (23.1)                   |                |
| 3-4                  | 50 (38.2)                     | 31 (35.2)                        | 9 (30)                         | 10 (76.9)                  |                |
| SUVmax (g/l)         | 15.4 [9]                      | 16.4 [9.5]                       | 12.9 [7.2]                     | 15 [9.1]                   | 0.228          |
| cT stage             |                               |                                  |                                |                            | 0.653          |
| 1                    | 4 (3.1)                       | 4 (4.5)                          | 0 (0)                          | 0 (0)                      |                |
| 2                    | 7 (5.3)                       | 5 (5.7)                          | 1 (3.3)                        | 1 (7.7)                    |                |
| 3                    | 120 (91.6)                    | 79 (89.8)                        | 29 (96.7)                      | 12 (92.3)                  |                |
| cN stage             |                               |                                  |                                |                            | 0.749          |
| 0                    | 31 (23.7)                     | 18 (20.5)                        | 9 (30)                         | 4 (30.8)                   |                |
| 1                    | 82 (62.6)                     | 56 (63.6)                        | 17 (56.7)                      | 9 (69.2)                   |                |
| 2-3                  | 15 (11.5)                     | 11 (12.5)                        | 4 (13.3)                       | 0 (0)                      |                |
| NAT type             |                               |                                  |                                |                            | 0.316          |
| Chemotherapy         | 24 (18.3)                     | 13 (14.8)                        | 6 (20)                         | 5 (38.5)                   |                |
| Chemoradiation       | 106 (80.9)                    | 74 (84.1)                        | 24 (80)                        | 8 (61.5)                   |                |
| Surgical approach    |                               |                                  |                                |                            | 0.200          |
| Lewis                | 109 (83.2)                    | 74 (84.1)                        | 26 (86.7)                      | 9 (69.2)                   |                |
| McKeown              | 16 (12.2)                     | 12 (13.6)                        | 2 (6.7)                        | 2 (15.4)                   |                |
| Transhiatal          | 6 (4.6)                       | 2 (2.3)                          | 2 (6.7)                        | 2 (15.4)                   |                |
| Severe complications | 41 (31.3)                     | 25 (28.4)                        | 12 (40)                        | 4 (30.8)                   | 0.497          |
| Anastomotic leakage  | 47 (35.9)                     | 32 (36.4)                        | 11 (36.7)                      | 4 (30.8)                   | 0.921          |
| pT stage             |                               |                                  |                                |                            | 0.001          |
| 0                    | 30 (22.9)                     | 30 (34.1)                        | 0 (0)                          | 0 (0)                      |                |
| 1                    | 21 (16)                       | 20 (22.7)                        | 1 (3.3)                        | 0 (0)                      |                |
| 2                    | 9 (6.9)                       | 9 (10.2)                         | 0 (0)                          | 0 (0)                      |                |

|                         |           |           |           |           |       |
|-------------------------|-----------|-----------|-----------|-----------|-------|
| 3                       | 71 (54.2) | 29 (33)   | 29 (96.7) | 13 (100)  |       |
| pN stage                |           |           |           |           | 0.004 |
| 0                       | 84 (64.1) | 66 (75)   | 13 (43.3) | 5 (38.5)  |       |
| 1                       | 28 (21.4) | 15 (17)   | 9 (30)    | 4 (30.8)  |       |
| 2                       | 9 (6.9)   | 5 (5.7)   | 2 (6.7)   | 2 (15.4)  |       |
| 3                       | 10 (7.6)  | 2 (2.3)   | 6 (20)    | 2 (15.4)  |       |
| TRG                     |           |           |           |           | 0.001 |
| 1-2                     | 65 (49.6) | 29 (33)   | 25 (83.3) | 11 (84.6) |       |
| 3-5                     | 59 (45)   | 52 (59.1) | 5 (16.7)  | 2 (15.4)  |       |
| Early recurrence        | 42 (32.1) | 19 (21.6) | 15 (50)   | 8 (61.5)  | 0.001 |
| Locoregional recurrence | 30 (22.9) | 16 (18.2) | 7 (23.3)  | 7 (53.8)  | 0.009 |
| Distant recurrence      | 45 (34.4) | 24 (27.3) | 13 (43.3) | 8 (61.5)  | 0.017 |

Categorical variables are expressed as N (%), and continuous variables as median (IQR).

**Online appendix 7 Subgroup survival analysis for patients who received NAT (SCC and AC)**

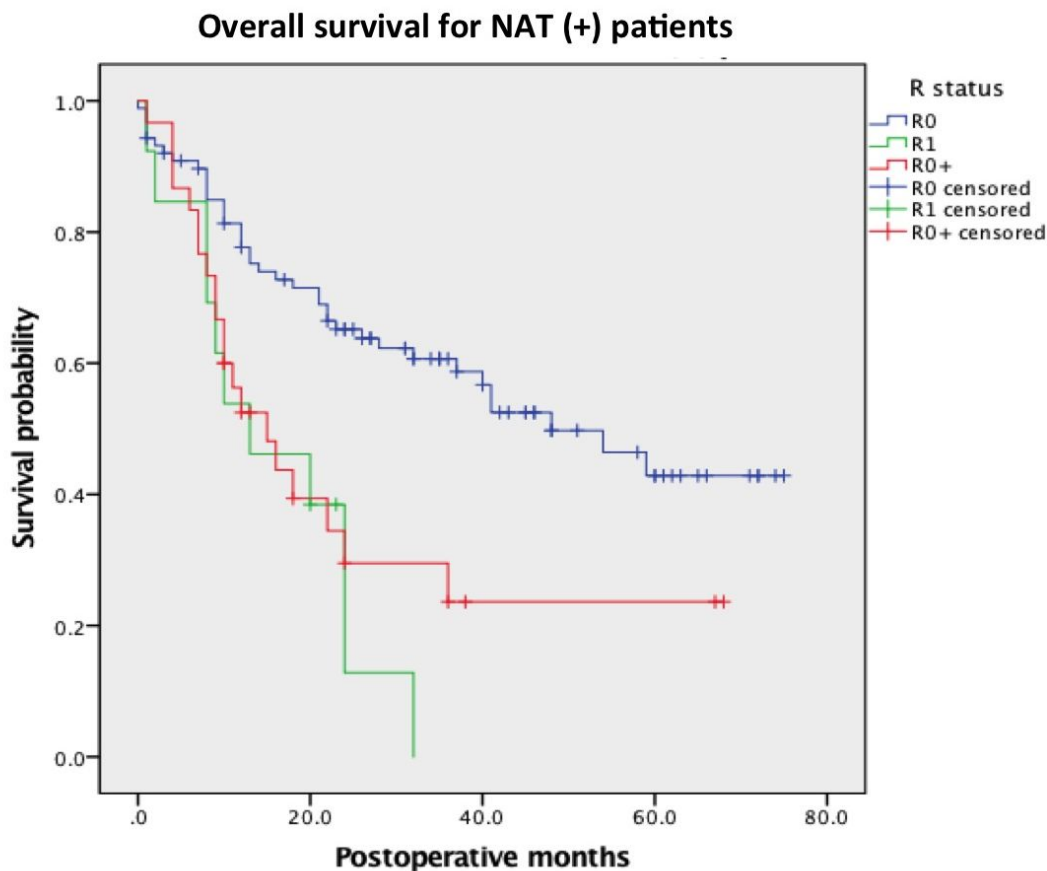

| Nb at risk | 0 mo | 20 mo | 40 mo | 60 mo | 80 mo |
|------------|------|-------|-------|-------|-------|
| R0         | 87   | 57    | 27    | 11    | 0     |
| R0+        | 29   | 8     | 1     | 0     | 0     |
| R1         | 12   | 4     | 0     | 0     | 0     |

Figure legend: R0 patients had a median OS of 48 months (95%CI 30.9-65.1), significantly better than R0+ (median 15 months 95%CI 7.5-22.4,  $p=0.002$ ) and R1 patients (median 13 months, 95%CI 0.1-25.9,  $p<0.001$ ). The difference was not significant between R0+ and R1 patients ( $p=0.461$ ).

R0: resection margins  $>1$ mm R0+: resection margins  $\leq 1$ mm R1: resection margins 0mm

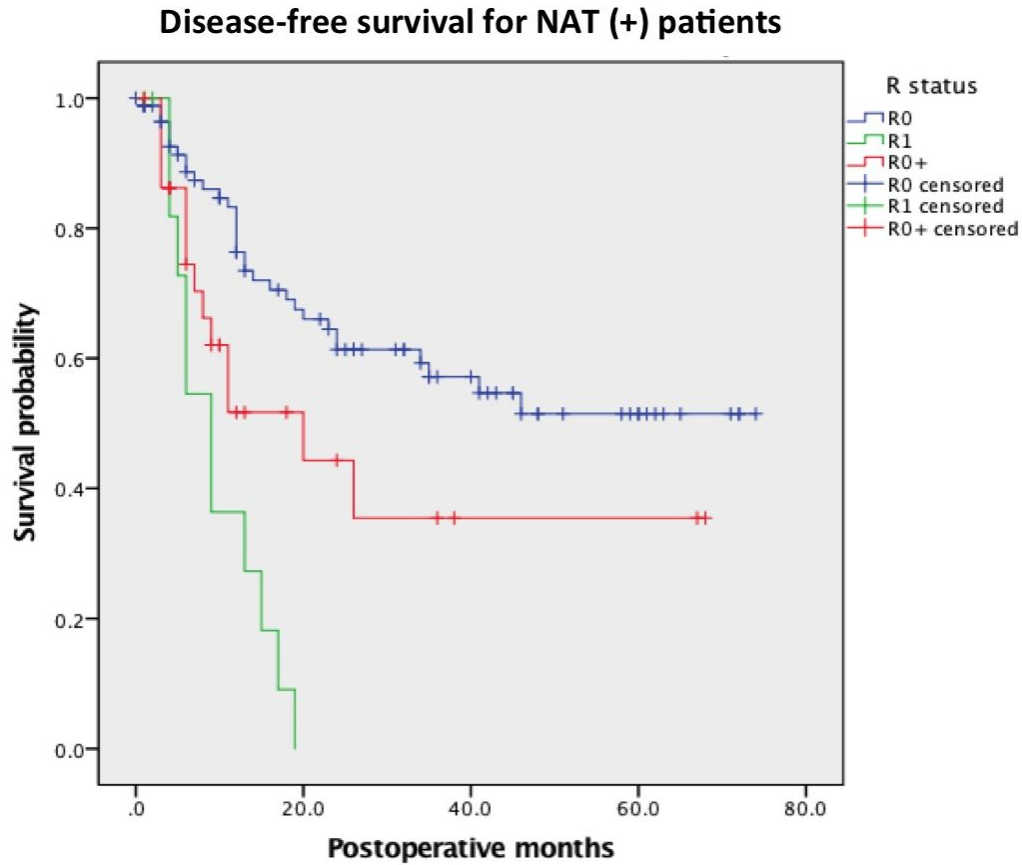

| Nb at risk | 0 mo | 20 mo | 40 mo | 60 mo | 80 mo |
|------------|------|-------|-------|-------|-------|
| R0         | 86   | 44    | 23    | 8     | 0     |
| R0+        | 29   | 6     | 1     | 0     | 0     |
| R1         | 12   | 0     | 0     | 0     | 0     |

Figure legend: R0 patients had a mean DFS of 46.6 months (95%CI 39.4-53.7), significantly better than R0+ (median 20 months 95%CI 26.3-33.7,  $p=0.032$ ) and R1 patients (median 9 months, 95%CI 5.9-12.1,  $p<0.001$ ). R0+ patients had a significantly better survival than R1 patients ( $p=0.015$ ).

R0: resection margins  $>1\text{mm}$  R0+: resection margins  $\leq 1\text{mm}$  R1: resection margins  $0\text{mm}$
